# Supplementary material for: Cd[B2(SO4)4] and H2[B2(SO4)4] – a phyllosilicate-analogous borosulfate and its homeotypic heteropolyacid
Source: Royal Society of Chemistry journal article supplement (doi:10.1039/d2dt02344j), 2022-01-01
Supplement: d2dt02344j1.pdf [file d2dt02344j1.pdf]

**Cd[B<sub>2</sub>(SO<sub>4</sub>)<sub>4</sub>] & H<sub>2</sub>[B<sub>2</sub>(SO<sub>4</sub>)<sub>4</sub>] –**

**A phyllosilicate analogue borosulfate and its homeotypic heteropolyacid**

**Matthias Hämmer<sup>a</sup>, Leonard C. Pasqualini<sup>b</sup>, Sean S. Sebastian<sup>c</sup>, Hubert Huppertz<sup>b</sup>, Henning A. Höppe<sup>a\*</sup>, and Jörn Bruns<sup>c\*</sup>**

[a] Dr. Matthias Hämmer, and Prof. Dr. Henning A. Höppe,  
Institut für Physik  
Universität Augsburg  
Universitätsstraße 1, 86159 Augsburg, Germany.  
E-mail: henning@ak-hoeppe.de

[b] Leonard C. Pasqualini, M.Sc., and Univ.-Prof. Dr. Hubert Huppertz  
Institute of General, Inorganic and Theoretical Chemistry  
University of Innsbruck  
Innrain 80-82, 6020 Innsbruck, Austria  
E-mail: Hubert.Huppertz@uibk.ac.at

[c] Sean S. Sebastian, M.Sc., and Dr. Jörn Bruns\*  
Institute of Inorganic Chemistry  
University of Cologne  
Greinstrasse 6, 50939 Cologne, Germany  
E-mail: j.bruns@uni-koeln.de

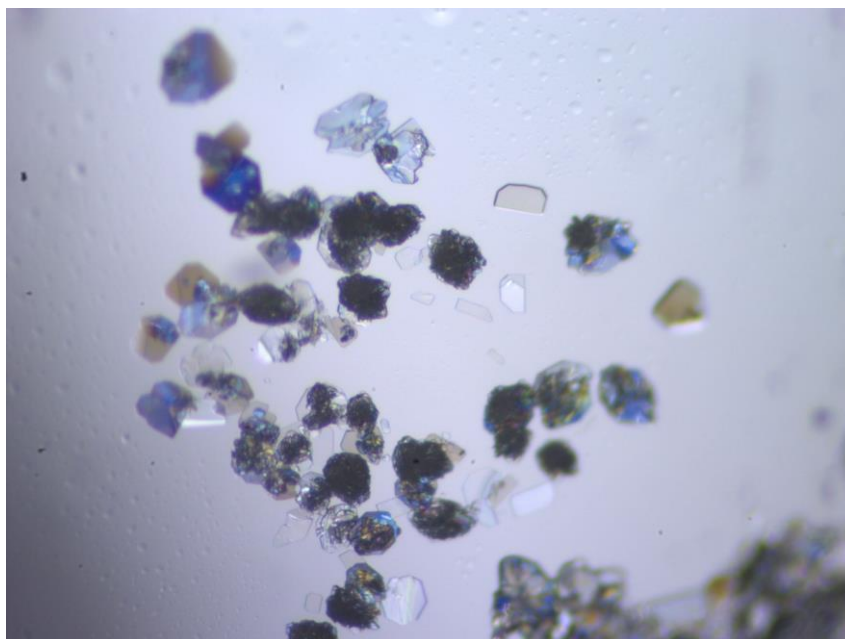

**Figure S1.** Single crystals of  $\text{H}_2[\text{B}_2(\text{SO}_4)_2]$  under a polarization microscope.

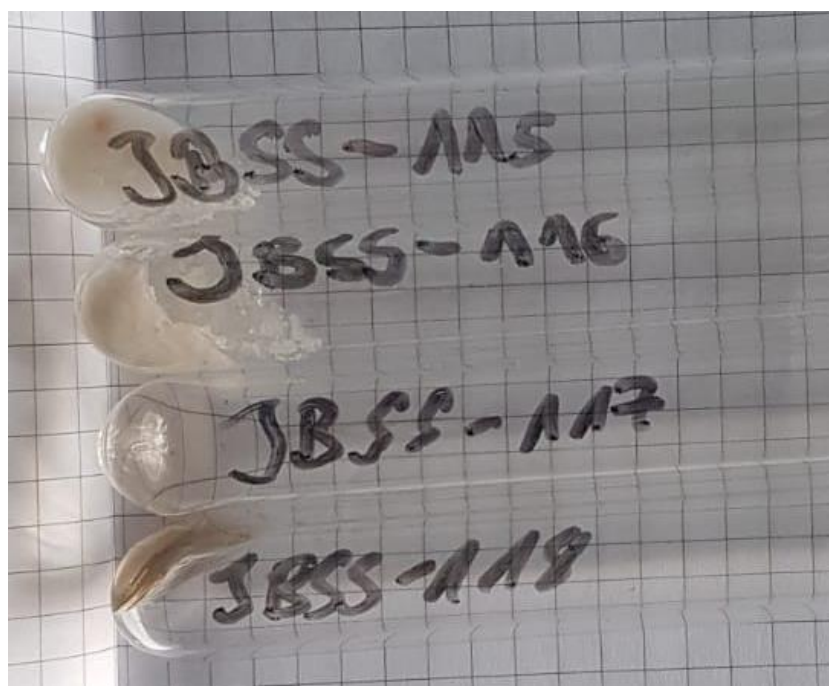

**Figure S2.** Top two ampoules: Single crystals and bulk material of  $\text{H}_2[\text{B}_2(\text{SO}_4)_2]$  (starting materials: 200 mg  $\text{B}_2\text{O}_3$  and 0.4 mL  $\text{SO}_3$ ); Bottom two ampoules: Liquid product of an identical reaction as performed for the first two ampoules, however with exactly 0.1 mL less  $\text{SO}_3$  (starting materials: 200 mg  $\text{B}_2\text{O}_3$  and 0.3 mL  $\text{SO}_3$ ).

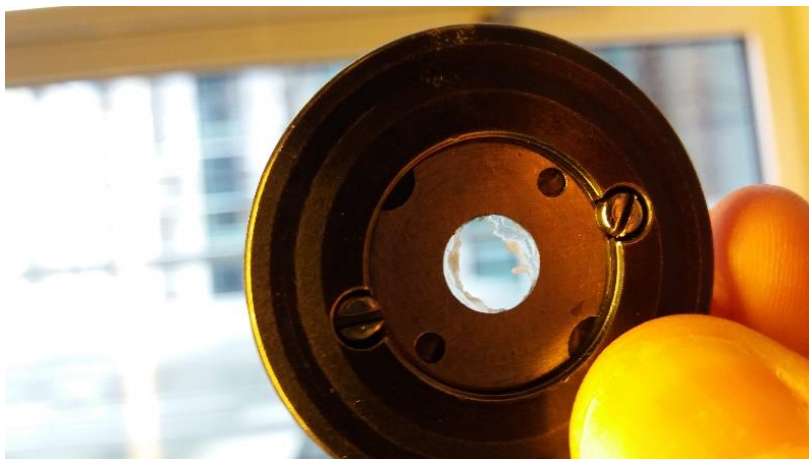

**Figure S3.** Destroyed polyacetate foil after 10 minutes contact of crystals of  $\text{H}_2[\text{B}_2(\text{SO}_4)_2]$  for PXRD.

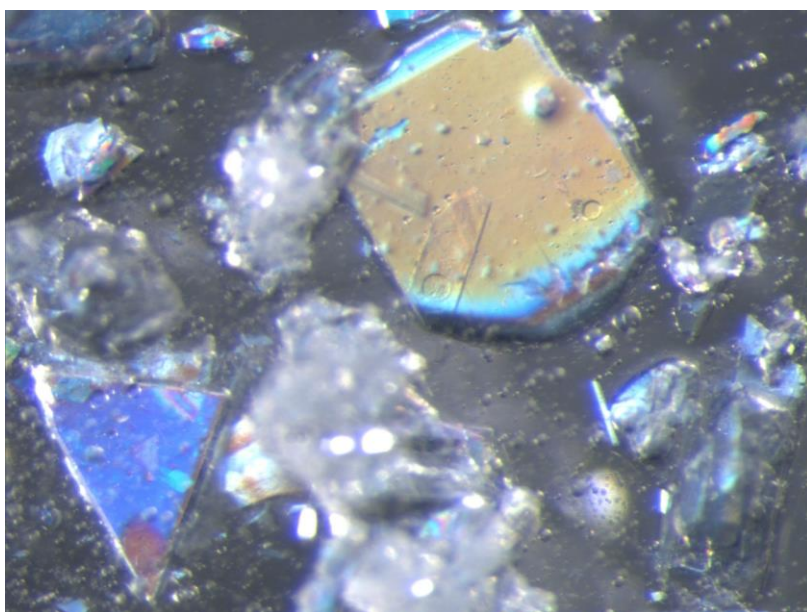

**Figure S4.** Single crystals of  $\text{Cd}[\text{B}_2(\text{SO}_4)_2]$  under a polarization microscope.

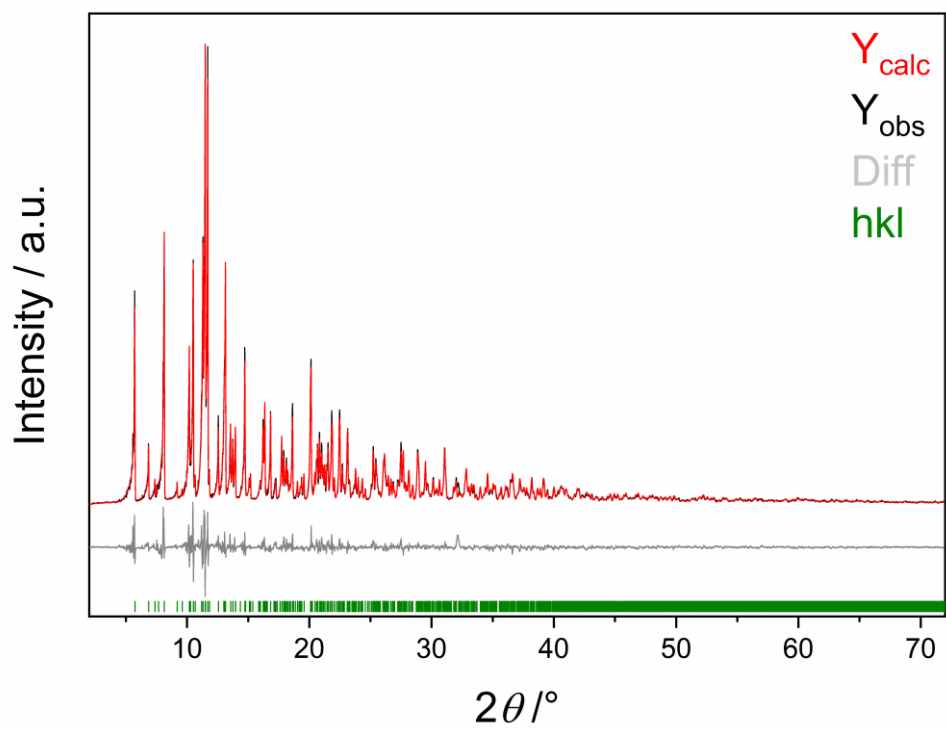

**Figure S5.** Rietveld refinement of the powder X-ray diffraction pattern of  $\text{Cd}[\text{B}_2(\text{SO}_4)_2]$  prepared by synthesis method **I**.

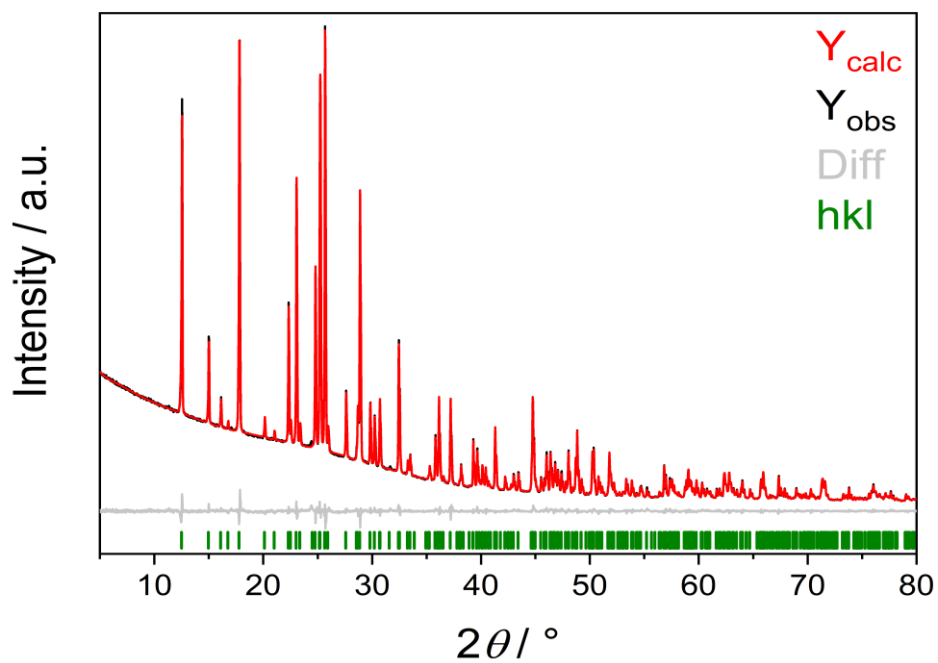

**Figure S6.** Rietveld refinement of the powder X-ray diffraction pattern of  $\text{Cd}[\text{B}_2(\text{SO}_4)_2]$  prepared by synthesis method **II**; details are found in table S1.

**Table S1.** Crystal data and structure refinements of Cd[B<sub>2</sub>(SO<sub>4</sub>)<sub>4</sub>] determined from powder XRD data via Rietveld refinement

|                                                |                                             |
|------------------------------------------------|---------------------------------------------|
| <i>M</i> / g mol <sup>-1</sup>                 | 518.26                                      |
| Temperature / K                                | 298(2)                                      |
| Space group                                    | <i>P</i> 2 <sub>1</sub> / <i>n</i> (no. 14) |
| <i>a</i> / pm                                  | 809.25(1)                                   |
| <i>b</i> / pm                                  | 797.00(1)                                   |
| <i>c</i> / pm                                  | 938.48(2)                                   |
| <i>β</i> / °                                   | 109.857(1)                                  |
| Volume / 10 <sup>6</sup> pm <sup>3</sup>       | 569.31(1)                                   |
| <i>Z</i>                                       | 2                                           |
| <i>ρ</i> <sub>calcd</sub> / g cm <sup>-3</sup> | 3.02                                        |
| Radiation; wavelength <i>λ</i> / Å             | CuK <sub>α</sub> ; 1.54184                  |
| Diffractometer                                 | Bruker D8 Advance                           |
| <i>θ</i> range / deg                           | 2.5–40                                      |
| Observed reflections                           | 350                                         |
| Refined parameters                             | 67                                          |
| <i>R</i> <sub>Bragg</sub>                      | 0.010                                       |
| <i>R</i> <sub>p</sub>                          | 0.014                                       |
| <i>R</i> <sub>wp</sub>                         | 0.021                                       |
| Goof                                           | 2.35                                        |

**Table S2.** Crystal data and structure refinement for H<sub>2</sub>[B<sub>2</sub>(SO<sub>4</sub>)<sub>4</sub>].

|                                                       |                                                                    |
|-------------------------------------------------------|--------------------------------------------------------------------|
| Formula weight                                        | 203.94                                                             |
| Temperature/K                                         | 173(2)                                                             |
| Crystal system                                        | triclinic                                                          |
| Space group                                           | $P\bar{1}$ (no. 2)                                                 |
| $a/\text{\AA}$                                        | 7.7014(7)                                                          |
| $b/\text{\AA}$                                        | 8.5004(8)                                                          |
| $c/\text{\AA}$                                        | 8.7264(8)                                                          |
| $\alpha/^\circ$                                       | 92.41(1)                                                           |
| $\beta/^\circ$                                        | 97.85(1)                                                           |
| $\gamma/^\circ$                                       | 90.31(1)                                                           |
| Volume/ $\text{\AA}^3$                                | 565.39(9)                                                          |
| $Z$                                                   | 2                                                                  |
| $\rho_{\text{calc}}/\text{g cm}^{-3}$                 | 2.396                                                              |
| Absorption coefficient/ $\text{mm}^{-1}$              | 0.942                                                              |
| $F(000)$                                              | 408                                                                |
| Crystal size/ $\text{mm}^3$                           | $0.1 \times 0.095 \times 0.09$                                     |
| $2\theta$ range for data collection                   | 4.7 to $75.8^\circ$                                                |
| Index ranges                                          | $-13 \leq h \leq 13$ ; $-14 \leq k \leq 14$ ; $-15 \leq l \leq 15$ |
| Reflections collected                                 | 46145                                                              |
| Independent reflections                               | 6113 [ $R_{\text{int}} = 0.0366$ ]                                 |
| Completeness to $\theta$                              | 100%                                                               |
| Absorption correction                                 | multi-scan                                                         |
| Refinement method                                     | Full-matrix least-squares on $F^2$                                 |
| Data/restraints/parameters                            | 6113 / 0 / 208                                                     |
| Goodness-of-fit on $F^2$                              | 1.039                                                              |
| Final $R$ indexes [ $I \geq 2\sigma(I)$ ]             | $R_1 = 0.0252$ ; $wR_2 = 0.0683$                                   |
| Final $R$ indexes [all data]                          | $R_1 = 0.0302$ ; $wR_2 = 0.0707$                                   |
| Largest diff. peak/hole/ $\text{e}^-/\text{\AA}^{-3}$ | 1.03 / -0.62                                                       |
| CSD number                                            | 2207483                                                            |

**Table S3.** Fractional atomic coordinates ( $\times 10^4$ ) and equivalent isotropic displacement parameters ( $\text{\AA}^2 \times 10^3$ ) for  $\text{H}_2[\text{B}_2(\text{SO}_4)_4]$ .  $U_{\text{eq}}$  is defined as 1/3 of the trace of the orthogonalized  $U_{ij}$  tensor.

| atom | <i>x</i>  | <i>y</i>   | <i>z</i>  | $U_{\text{eq}}$ |
|------|-----------|------------|-----------|-----------------|
| S1   | 8091.1(3) | 11403.3(2) | 1847.5(2) | 8.49(4)         |
| S2   | 3384.1(3) | 9208.8(3)  | 3498.1(2) | 8.67(4)         |
| S3   | 8153.1(3) | 6405.3(2)  | 3943.5(2) | 7.52(4)         |
| S4   | 3277.6(3) | 4503.0(2)  | 1140.9(2) | 8.50(4)         |
| B1   | 6876(1)   | 9374(1)    | 3787(1)   | 8.5(1)          |
| B2   | 6799(1)   | 4314(1)    | 1656(1)   | 8.8(1)          |
| O1   | 7099(1)   | 10394(1)   | 569.9(9)  | 20.3(2)         |
| O2   | 9741(1)   | 11942(1)   | 1569(1)   | 18.1(1)         |
| O3   | 8202.6(9) | 10418.6(8) | 3241.4(8) | 10.6(1)         |
| O4   | 7204.9(9) | 9429.5(8)  | 5469.5(8) | 10.9(1)         |
| O5   | 7154.5(9) | 7757.4(8)  | 3195.9(8) | 10.7(1)         |
| O6   | 5140.2(9) | 9852.8(8)  | 3096.2(8) | 10.3(1)         |
| O7   | 2176(1)   | 9192.1(1)  | 2092.8(8) | 16.0(1)         |
| O8   | 3635(1)   | 7808.3(8)  | 4320.6(9) | 13.4(1)         |
| O9   | 9845.6(9) | 6802.4(9)  | 4689.8(9) | 14.5(1)         |
| O10  | 6952(1)   | 5694.2(9)  | 4942.8(9) | 14.4(1)         |
| O11  | 8222.6(9) | 5273.7(8)  | 2584.5(8) | 10.0(1)         |
| O12  | 7147(1)   | 4219.1(8)  | 52.8(8)   | 11.3(1)         |
| O13  | 6862.1(9) | 2702.4(8)  | 2223.4(8) | 11.9(1)         |
| O14  | 2129(0)   | 4832.4(1)  | 2279.4(8) | 14.8(1)         |
| O15  | 3280(1)   | 2986.0(8)  | 402.5(9)  | 15.9(1)         |
| O16  | 5130.5(9) | 4996.2(8)  | 1914.7(8) | 10.7(1)         |
| H1   | 7380(30)  | 10550(30)  | -280(30)  | 53(7)           |
| H2   | 7340(30)  | 5560(30)   | 5850(30)  | 58(8)           |

**Table S4.** Anisotropic displacement parameters ( $\text{\AA}^2 \times 10^3$ ) for  $\text{H}_2[\text{B}_2(\text{SO}_4)_4]$ . The anisotropic displacement factor exponent takes the form:  $-2\pi^2[h^2a^{*2}U_{11}+\dots+2hka \times b \times U_{12}]$

| atom | $U_{11}$ | $U_{22}$ | $U_{33}$ | $U_{23}$ | $U_{13}$ | $U_{12}$ |
|------|----------|----------|----------|----------|----------|----------|
| S1   | 11.17(8) | 5.45(8)  | 9.52(8)  | 1.22(6)  | 3.52(6)  | 0.16(6)  |
| S2   | 9.99(8)  | 9.20(8)  | 6.75(8)  | -0.58(6) | 1.21(6)  | 0.61(6)  |
| S3   | 8.78(8)  | 6.05(8)  | 7.48(8)  | 0.20(6)  | 0.26(6)  | 0.46(6)  |
| S4   | 9.45(8)  | 8.54(8)  | 7.72(8)  | 0.87(6)  | 1.77(6)  | -1.10(6) |
| B1   | 10.7(3)  | 6.8(3)   | 8.1(3)   | 0.9(3)   | 1.9(3)   | 1.4(3)   |
| B2   | 10.6(3)  | 7.2(3)   | 8.6(3)   | 0.9(3)   | 1.3(3)   | 1.3(3)   |
| O1   | 33.9(4)  | 17.0(3)  | 10.1(3)  | -4.4(2)  | 5.2(3)   | -10.2(3) |
| O2   | 12.8(3)  | 17.0(3)  | 26.7(4)  | 8.5(3)   | 8.5(3)   | 0.6(2)   |
| O3   | 11.8(3)  | 9.0(2)   | 11.2(3)  | 4.3(2)   | 1.4(2)   | -0.1(2)  |
| O4   | 15.2(3)  | 10.1(3)  | 7.4(2)   | 0.2(2)   | 2.1(2)   | 4.2(2)   |
| O5   | 16.6(3)  | 5.6(2)   | 9.4(2)   | 0.8(2)   | 0.2(2)   | 2.9(2)   |
| O6   | 10.0(2)  | 10.9(3)  | 10.5(2)  | 3.7(2)   | 2.2(2)   | 1.2(2)   |
| O7   | 13.9(3)  | 25.0(4)  | 8.2(3)   | -2.1(2)  | -1.4(2)  | 0.2(3)   |
| O8   | 17.3(3)  | 8.2(3)   | 15.4(3)  | 1.9(2)   | 4.1(2)   | -0.4(2)  |
| O9   | 11.2(3)  | 15.1(3)  | 15.6(3)  | -2.2(2)  | -3.0(2)  | -1.5(2)  |
| O10  | 15.0(3)  | 18.2(3)  | 10.6(3)  | 5.8(2)   | 2.7(2)   | -1.8(2)  |
| O11  | 9.6(2)   | 9.0(2)   | 10.8(2)  | -3.3(2)  | 0.85(19) | 1.4(2)   |
| O12  | 16.2(3)  | 10.4(3)  | 7.6(2)   | 2.0(2)   | 2.3(2)   | 4.0(2)   |
| O13  | 14.9(3)  | 7.0(2)   | 15.0(3)  | 3.4(2)   | 5.6(2)   | 3.0(2)   |
| O14  | 12.4(3)  | 23.2(3)  | 9.9(3)   | 2.7(2)   | 4.6(2)   | -0.3(2)  |
| O15  | 20.8(3)  | 8.1(3)   | 18.0(3)  | -1.6(2)  | 0.4(3)   | -2.3(2)  |
| O16  | 8.6(2)   | 10.7(3)  | 12.0(3)  | -1.9(2)  | 0.0(2)   | 1.5(2)   |



**Table S5.** Experimental bond lengths for H<sub>2</sub>[B<sub>2</sub>(SO<sub>4</sub>)<sub>4</sub>].

| atom | atom             | bond length/ Å |
|------|------------------|----------------|
| S1   | O1               | 1.4975(8)      |
| S1   | O2               | 1.4040(8)      |
| S1   | O3               | 1.4985(7)      |
| S1   | O13 <sup>1</sup> | 1.5128(7)      |
| S2   | O4 <sup>2</sup>  | 1.5449(7)      |
| S2   | O6               | 1.5457(7)      |
| S2   | O7               | 1.4339(8)      |
| S2   | O8               | 1.4164(7)      |
| S3   | O5               | 1.5078(7)      |
| S3   | O9               | 1.4078(7)      |
| S3   | O10              | 1.4969(7)      |
| S3   | O11              | 1.5022(7)      |
| S4   | O12 <sup>3</sup> | 1.5420(7)      |
| S4   | O14              | 1.4381(7)      |
| S4   | O15              | 1.4172(8)      |
| S4   | O16              | 1.5410(7)      |
| O3   | B1               | 1.489(1)       |
| O4   | B1               | 1.455(1)       |
| O5   | B1               | 1.474(1)       |
| O6   | B1               | 1.457(1)       |
| O11  | B2               | 1.488(1)       |
| O12  | B2               | 1.459(1)       |
| O13  | B2               | 1.475(1)       |
| O16  | B2               | 1.454(1)       |

<sup>1</sup>+x,1+y,+z; <sup>2</sup>1-x,2-y,1-z; <sup>3</sup>1-x,1-y,-z

**Table S6.** Experimental bond angles for H<sub>2</sub>[B<sub>2</sub>(SO<sub>4</sub>)<sub>4</sub>].

| atom            | atom | atom             | angle/°   | atom | atom | atom            | angle/°   |
|-----------------|------|------------------|-----------|------|------|-----------------|-----------|
| O1              | S1   | O3               | 104.51(4) | O15  | S4   | O16             | 111.20(4) |
| O1              | S1   | O13 <sup>1</sup> | 106.30(5) | B1   | O3   | S1              | 130.74(6) |
| O2              | S1   | O1               | 115.48(5) | B1   | O4   | S2 <sup>2</sup> | 123.75(6) |
| O2              | S1   | O3               | 112.47(5) | B1   | O5   | S3              | 131.15(6) |
| O2              | S1   | O13 <sup>1</sup> | 114.05(5) | B1   | O6   | S2              | 125.44(6) |
| O3              | S1   | O13 <sup>1</sup> | 102.82(4) | B2   | O11  | S3              | 129.96(6) |
| O4 <sup>2</sup> | S2   | O6               | 101.95(4) | B2   | O12  | S4 <sup>3</sup> | 125.82(6) |
| O7              | S2   | O4 <sup>2</sup>  | 105.57(4) | B2   | O13  | S1 <sup>4</sup> | 127.11(6) |
| O7              | S2   | O6               | 106.33(4) | B2   | O16  | S4              | 128.21(6) |
| O8              | S2   | O4 <sup>2</sup>  | 111.23(4) | O4   | B1   | O3              | 107.22(7) |
| O8              | S2   | O6               | 111.18(4) | O4   | B1   | O5              | 109.21(7) |
| O8              | S2   | O7               | 119.06(5) | O4   | B1   | O6              | 116.30(7) |
| O9              | S3   | O5               | 114.60(4) | O5   | B1   | O3              | 107.82(7) |
| O9              | S3   | O10              | 115.43(5) | O6   | B1   | O3              | 108.41(7) |
| O9              | S3   | O11              | 111.38(4) | O6   | B1   | O5              | 107.59(7) |
| O10             | S3   | O5               | 105.37(4) | O12  | B2   | O11             | 108.14(7) |
| O10             | S3   | O11              | 107.01(4) | O12  | B2   | O13             | 107.70(7) |
| O11             | S3   | O5               | 101.88(4) | O13  | B2   | O11             | 108.74(7) |
| O14             | S4   | O12 <sup>3</sup> | 104.38(4) | O006 | B2   | O11             | 108.04(7) |
| O14             | S4   | O16              | 106.03(4) | O006 | B2   | O12             | 115.89(7) |
| O15             | S4   | O12 <sup>3</sup> | 111.13(4) | O006 | B2   | O13             | 108.16(7) |
| O15             | S4   | O14              | 120.23(5) |      |      |                 |           |

<sup>1</sup><sub>+x,1+y,+z</sub>; <sup>2</sup><sub>1-x,2-y,1-z</sub>; <sup>3</sup><sub>1-x,1-y,-z</sub>; <sup>4</sup><sub>+x,-1+y,+z</sub>

**Table S7.** Hydrogen bonds in  $\text{H}_2[\text{B}_2(\text{SO}_4)_4]$ .

| D               | H  | A                | $d(\text{D-H})/\text{\AA}$ | $d(\text{H-A})/\text{\AA}$ | $d(\text{D-A})/\text{\AA}$ | D-H-A/ $^\circ$ |
|-----------------|----|------------------|----------------------------|----------------------------|----------------------------|-----------------|
| O1 <sup>1</sup> | H1 | O7 <sup>2</sup>  | 0.82                       | 1.69                       | 2.501(1)                   | 175.9           |
| O10             | H2 | O14 <sup>3</sup> | 0.82                       | 1.68                       | 2.491(1)                   | 172.2           |

<sup>1</sup>1-x,2-y,1-z; <sup>2</sup>x,y,1+z; <sup>3</sup>1-x,1-y,1-z

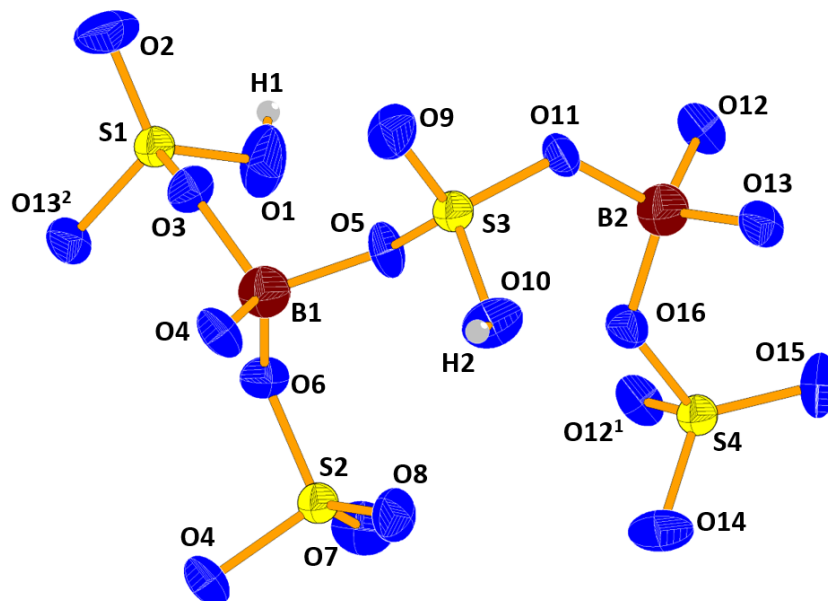

**Figure S7.** Asymmetric unit of  $\text{H}_2[\text{B}_2(\text{SO}_4)_4]$ . The thermal ellipsoids are set on 90% probability level. (Symmetry operators: <sup>1</sup>1-x,1-y,-z; <sup>2</sup>x,y,1+z).

**Table S8.** Crystal data and structure refinement for Cd[B<sub>2</sub>(SO<sub>4</sub>)<sub>4</sub>] determined from single-crystal XRD.

|                                                              |                                                                 |                                                               |
|--------------------------------------------------------------|-----------------------------------------------------------------|---------------------------------------------------------------|
| Formula weight                                               | 518.25                                                          |                                                               |
| Temperature/K                                                | 173(2)                                                          | 250(2)                                                        |
| Crystal system                                               | monoclinic                                                      |                                                               |
| Space group                                                  | <i>P</i> 2 <sub>1</sub> / <i>n</i> (no. 14)                     |                                                               |
| <i>a</i> / Å                                                 | 8.061(1)                                                        | 8.076(1)                                                      |
| <i>b</i> / Å                                                 | 7.9599(5)                                                       | 7.975(19)                                                     |
| <i>c</i> / Å                                                 | 9.405(1)                                                        | 9.395(1)                                                      |
| $\beta$ / °                                                  | 109.96(1)                                                       | 110.01(1)                                                     |
| Volume/ Å <sup>3</sup>                                       | 567.2(1)                                                        | 568.6(2)                                                      |
| <i>Z</i>                                                     | 2                                                               |                                                               |
| $\rho_{\text{calc}}$ / g cm <sup>-3</sup>                    | 3.035                                                           | 3.027                                                         |
| Absorption coefficient/ mm <sup>-1</sup>                     | 2.765                                                           | 2.76                                                          |
| <i>F</i> (000)                                               | 500                                                             | 500                                                           |
| Crystal size/ mm <sup>3</sup>                                | 0.172 × 0.06 × 0.06                                             | 0.05 × 0.04 × 0.02                                            |
| 2 $\theta$ range for data collection                         | 5.8 - 82.6°                                                     | 5.8-67.0°                                                     |
| Index range <i>h</i>   <i>k</i>   <i>l</i>                   | ±14 ±14 ±17                                                     | ±11 ±11 ±12                                                   |
| Reflections collected                                        | 56664                                                           | 23626                                                         |
| Independent reflections                                      | 3799                                                            | 2230                                                          |
| Completeness to $\theta$                                     | 100%                                                            |                                                               |
| Absorption correction                                        | multi-scan                                                      |                                                               |
| Refinement method                                            | Full-matrix least-squares on <i>F</i> <sup>2</sup>              |                                                               |
| Data/restraints/parameters                                   | 3799 / 0 / 107                                                  | 2230 / 0 / 106                                                |
| Goodness-of-fit on <i>F</i> <sup>2</sup>                     | 1.138                                                           | 1.11                                                          |
| Final <i>R</i> indexes [ <i>I</i> ≥ 2 $\sigma$ ( <i>I</i> )] | <i>R</i> <sub>1</sub> = 0.0143; <i>wR</i> <sub>2</sub> = 0.0379 | <i>R</i> <sub>1</sub> = 0.030; <i>wR</i> <sub>2</sub> = 0.064 |
| Final <i>R</i> indexes [all data]                            | <i>R</i> <sub>1</sub> = 0.0163; <i>wR</i> <sub>2</sub> = 0.0386 | <i>R</i> <sub>1</sub> = 0.043; <i>wR</i> <sub>2</sub> = 0.067 |
| Largest diff. peak/hole/ e <sup>-</sup> /Å <sup>-3</sup>     | 0.705 / -0.448                                                  | 0.87 / -0.86                                                  |
| CSD number                                                   | 2176209                                                         | 2171676                                                       |

**Table S9.** Fractional atomic coordinates ( $\times 10^4$ ) and equivalent isotropic displacement parameters ( $\text{\AA}^2 \times 10^3$ ) for  $\text{Cd}[\text{B}_2(\text{SO}_4)_4]$  at 173 K.  $U_{\text{eq}}$  is defined as 1/3 of the trace of the orthogonalized  $U_{ij}$  tensor.

| atom | <i>x</i>  | <i>y</i>  | <i>z</i>  | $U_{\text{eq}}$ |
|------|-----------|-----------|-----------|-----------------|
| Cd1  | 5000      | 0         | 5000      | 6.68(2)         |
| B1   | 6370(2)   | 4713(2)   | 3582.6(9) | 7.1(2)          |
| S1   | 7930.0(2) | 1735.3(2) | 3463.0(2) | 6.84(3)         |
| S2   | 3099.2(2) | 4184.0(2) | 3600.0(2) | 5.49(3)         |
| O111 | 6500.1(8) | 3088.9(7) | 2926.9(6) | 10.16(8)        |
| O121 | 4457.4(8) | 5103.6(7) | 3087.5(7) | 8.12(8)         |
| O122 | 2799.1(8) | 5387.4(7) | 4747.4(6) | 8.46(8)         |
| O11  | 7308.9(9) | 474.9(9)  | 4265.3(8) | 15.0(2)         |
| O12  | 9621.7(8) | 2406.2(9) | 4229.3(8) | 16.9(2)         |
| O21  | 3788.7(8) | 2618.7(7) | 4306.4(6) | 9.58(8)         |
| O22  | 1496.6(8) | 4105.1(8) | 2337.2(6) | 12.26(9)        |
| O112 | 7744.0(8) | 1061.4(8) | 1897.8(6) | 11.13(9)        |

**Table S10.** Anisotropic displacement parameters ( $\text{\AA}^2 \times 10^3$ ) for  $\text{Cd}[\text{B}_2(\text{SO}_4)_4]$  at 173 K. The anisotropic displacement factor exponent takes the form:  $-2\pi^2[h^2a^{*2}U_{11} + \dots + 2hka \times b \times U_{12}]$ .

| atom | $U_{11}$ | $U_{22}$ | $U_{33}$ | $U_{23}$ | $U_{13}$ | $U_{12}$ |
|------|----------|----------|----------|----------|----------|----------|
| Cd1  | 7.92(3)  | 6.34(3)  | 5.52(3)  | 0.19(2)  | 1.96(2)  | 0.51(2)  |
| B1   | 9.1(3)   | 6.5(2)   | 7.3(2)   | 0.1(2)   | 4.9(2)   | 0.0(2)   |
| S1   | 7.06(6)  | 8.05(6)  | 6.70(6)  | -1.02(5) | 4.03(5)  | 0.20(5)  |
| S2   | 6.68(6)  | 5.28(6)  | 4.50(5)  | 0.59(4)  | 1.92(4)  | 0.19(4)  |
| O111 | 10.9(2)  | 8.8(2)   | 10.8(2)  | -2.9(2)  | 3.6(2)   | 2.8(2)   |
| O121 | 8.9(2)   | 7.8(2)   | 9.5(2)   | 2.7(2)   | 5.4(2)   | 1.0(2)   |
| O122 | 12.2(2)  | 8.2(2)   | 6.5(2)   | 0.5(2)   | 5.0(2)   | 3.1(2)   |
| O11  | 17.1(2)  | 15.3(3)  | 17.5(3)  | 6.4(2)   | 12.2(2)  | 2.2(2)   |
| O12  | 8.8(2)   | 20.3(3)  | 19.3(3)  | -5.2(2)  | 2.1(2)   | -3.1(2)  |
| O21  | 13.1(2)  | 5.2(2)   | 11.0(2)  | 2.4(2)   | 4.7(2)   | 1.7(2)   |
| O22  | 10.4(2)  | 16.2(2)  | 7.0(2)   | 2.3(2)   | -1.2(2)  | -2.8(2)  |
| O112 | 14.6(2)  | 12.7(2)  | 7.3(2)   | -1.6(2)  | 5.2(2)   | 5.5(2)   |

**Table S11.** Wyckoff symbol, atomic coordinates  $x$ ;  $y$ ;  $z$  and equivalent isotropic displacement parameters  $U_{\text{eq}}$  in  $\text{\AA}^2$  for  $\text{Cd}[\text{B}_2(\text{SO}_4)_4]$  at 250 K.

| Atom | Wyckoff symbol | $x$         | $y$        | $z$        | $U_{\text{eq}}$ |
|------|----------------|-------------|------------|------------|-----------------|
| Cd1  | $2a$           | 0           | 0          | 0          | 0.00981(7)      |
| S1   | $4e$           | 0.18967(7)  | 0.41774(7) | 0.14024(6) | 0.00795(11)     |
| S2   | $4e$           | -0.29299(8) | 0.17394(7) | 0.15331(7) | 0.01002(11)     |
| O11  | $4e$           | 0.1507(2)   | -0.0900(3) | 0.2337(2)  | 0.0170(4)       |
| O12  | $4e$           | 0.1211(2)   | 0.2612(2)  | 0.0700(2)  | 0.0134(3)       |
| O13  | $4e$           | 0.2190(2)   | 0.5381(2)  | 0.0247(2)  | 0.0118(3)       |
| O14  | $4e$           | 0.0544(2)   | 0.5097(2)  | 0.1916(2)  | 0.0116(3)       |
| O21  | $4e$           | -0.4611(3)  | 0.2402(3)  | 0.0757(2)  | 0.0241(4)       |
| O22  | $4e$           | -0.2297(3)  | 0.0485(3)  | 0.0745(3)  | 0.0213(4)       |
| O23  | $4e$           | -0.2759(2)  | 0.1071(2)  | 0.3100(2)  | 0.0153(4)       |
| O24  | $4e$           | -0.1515(2)  | 0.3096(2)  | 0.2069(2)  | 0.0144(4)       |
| B1   | $4e$           | -0.1375(4)  | 0.4715(3)  | 0.1417(3)  | 0.0101(5)       |

**Table S12.** Anisotropic displacement parameters  $U_{ij}$  in  $\text{\AA}^2$  for  $\beta\text{-Cu}[\text{B}_2(\text{SO}_4)_4]$  at 250 K.

| Atom | $U_{11}$    | $U_{22}$    | $U_{33}$    | $U_{23}$     | $U_{13}$   | $U_{12}$     |
|------|-------------|-------------|-------------|--------------|------------|--------------|
| Cd1  | 0.01152(11) | 0.00943(10) | 0.00798(11) | -0.00031(9)  | 0.00269(8) | -0.00072(9)  |
| S1   | 0.0096(2)   | 0.0078(2)   | 0.0064(3)   | -0.00082(19) | 0.0027(2)  | -0.00035(18) |
| S2   | 0.0103(2)   | 0.0118(2)   | 0.0100(3)   | 0.0015(2)    | 0.0060(2)  | -0.00038(19) |
| O11  | 0.0156(9)   | 0.0214(9)   | 0.0104(9)   | 0.0037(7)    | -0.0004(7) | -0.0024(7)   |
| O12  | 0.0175(8)   | 0.0077(7)   | 0.0157(9)   | -0.0021(7)   | 0.0065(7)  | -0.0018(6)   |
| O13  | 0.0168(8)   | 0.0099(7)   | 0.0100(8)   | -0.0011(6)   | 0.0064(7)  | -0.0042(6)   |
| O14  | 0.0139(8)   | 0.0106(7)   | 0.0124(8)   | -0.0038(7)   | 0.0073(7)  | -0.0009(6)   |
| O21  | 0.0150(9)   | 0.0285(11)  | 0.0255(12)  | 0.0067(9)    | 0.0029(8)  | 0.0033(8)    |
| O22  | 0.0247(10)  | 0.0208(9)   | 0.0254(11)  | -0.0083(8)   | 0.0178(9)  | -0.0038(8)   |
| O23  | 0.0182(9)   | 0.0188(9)   | 0.0098(9)   | 0.0014(7)    | 0.0061(7)  | -0.0084(7)   |
| O24  | 0.0161(8)   | 0.0126(8)   | 0.0142(9)   | 0.0049(7)    | 0.0049(7)  | -0.0029(7)   |
| B1   | 0.0122(11)  | 0.0095(12)  | 0.0106(12)  | 0.0011(9)    | 0.0064(10) | -0.0004(8)   |

**Table S13.** Selected interatomic distances /pm and angles /deg in Cd[B<sub>2</sub>(SO<sub>4</sub>)<sub>4</sub>] at 173 K, 250 K and 300 K determined by single crystal XRD and Rietveld refinement, respectively; the respective standard deviations are given in parentheses.

| Distance / angle                | 173 K (SC-XRD)      | 250 K (SC-XRD)    | 300 K (Rietveld)  |
|---------------------------------|---------------------|-------------------|-------------------|
| Cd-O                            | 222.77(6)-229.98(6) | 222.9(2)-230.0(2) | 222.7(6)-228.4(5) |
| $\sum \text{IR}(\text{Cd-O})^3$ | 220                 | 220               | 220               |
| S-O                             | 141.19(7)-153.19(6) | 140.6(2)-152.8(2) | 137(1)-154(1)     |
| $\sum \text{IR}(\text{S-O})^3$  | 147                 | 147               | 147               |
| B-O                             | 144.5(2)-148.4(2)   | 144.3(3)-148.9(3) | 141(1)-151(1)     |
| $\sum \text{IR}(\text{B-O})^3$  | 146                 | 146               | 146               |
| O-S-O                           | 96.59(3)-116.46(4)  | 96.8(1)-116.4(1)  | 97.7(3)-117.2(3)  |
| O-B-O                           | 105.75(6)-114.45(6) | 105.8(2)-114.7(2) | 103.7(6)-114.1(9) |

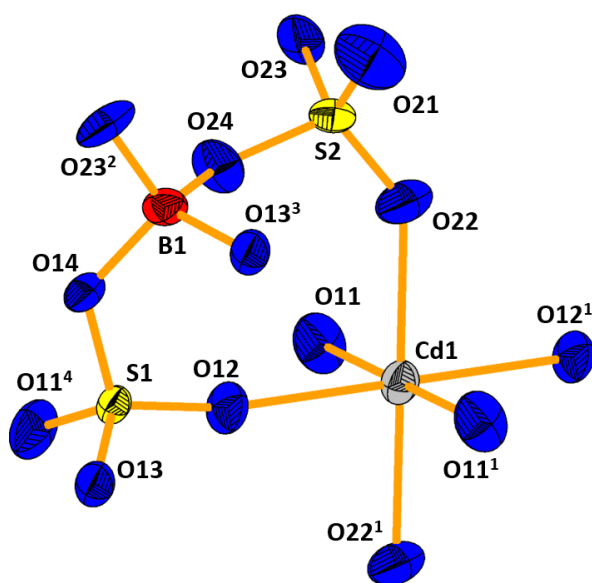

**Figure S8.** Extended asymmetric unit of Cd[B<sub>2</sub>(SO<sub>4</sub>)<sub>4</sub>]. The thermal ellipsoids are set on 90% probability level. (Symmetry operators: <sup>1</sup>-x, -y, -z; <sup>2</sup>-1/2-x, 1/2+y, 1/2-z; <sup>2</sup>--x, 1-y, z; <sup>1</sup>1/2-x, 1/2+y, 1/2-z)

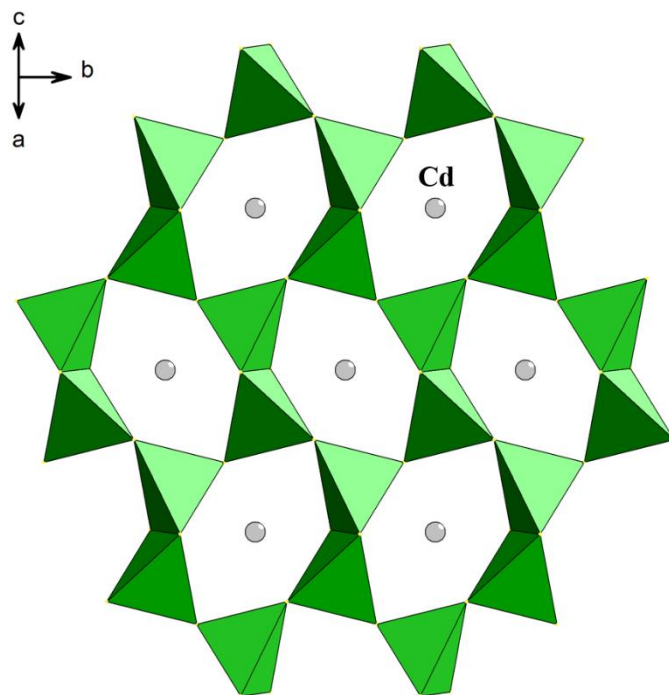

**Figure S9.** Layers in  $\text{Cd}[\text{B}_2(\text{SO}_4)_2]$  formed by corner and edge sharing super-tetrahedra  $\text{B}(\text{SO}_4)_4$  resulting in *sechser* rings with the cations located inside and corner sharing dimers of super-tetrahedra; super-tetrahedra light green, cadmium atoms grey, sulfur atoms yellow; oxygen atoms are omitted.

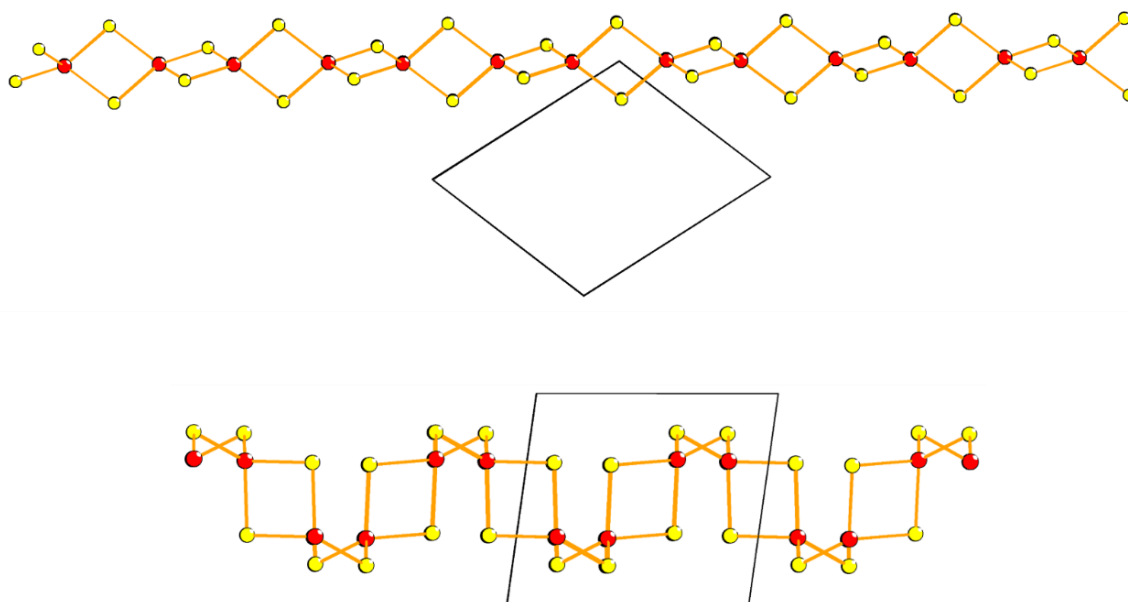

**Figure S10.** Comparison of both anionic networks just displaying the B (red) and S atoms (yellow) for better clarity viewed along the *vierer* rings;  $\text{Cd}[\text{B}_2(\text{SO}_4)_2]$  (top) and  $\text{H}_2[\text{B}_2(\text{SO}_4)_2]$  (bottom) show the same topology but very different conformations, thus preventing a simple and reasonable group-subgroup relationship according to a Bärnighausen scheme.



**Table S14.** Electrostatic calculations  $\text{H}_2[\text{B}_2(\text{SO}_4)_4]$  and  $\text{Cd}[\text{B}_2(\text{SO}_4)_4]$ .<sup>[1-4]</sup>

|                                                        |                                                             |
|--------------------------------------------------------|-------------------------------------------------------------|
| $\text{H}_2[\text{B}_2(\text{SO}_4)_4]$                | $\text{H}_2\text{O} + \text{B}_2\text{O}_3 + 4 \text{SO}_3$ |
| MAPLE = 147036 kJ mol <sup>-1</sup>                    | MAPLE = 146662 kJ mol <sup>-1</sup>                         |
| ( $\Delta = 0.25\%$ )                                  |                                                             |
| $\text{Cd}[\text{B}_2(\text{SO}_4)_4]$                 | $\text{CdSO}_4 + \text{B}_2\text{O}_3 + 3 \text{SO}_3$      |
| MAPLE = 146705 kJ mol <sup>-1</sup>                    | MAPLE = 146270 kJ mol <sup>-1</sup>                         |
| ( $\Delta$ Fehler! Textmarke nicht definiert. = 0.30%) |                                                             |

**Table S15.** ECon derived by MAPLE-calculations for cadmium atoms in  $\text{Cd}[\text{B}_2(\text{SO}_4)_4]$  using our data at 250 K

| Atom         | x       | y       | z       | Distance / pm | Econ(1) | Econ(2) |
|--------------|---------|---------|---------|---------------|---------|---------|
| Central atom |         |         |         |               |         |         |
| Cd1          | 0       | 0       | 0       |               |         |         |
| Ligand       |         |         |         |               |         |         |
| O22          | 0.2297  | -0.0485 | -0.0745 | 222.932       | 1.059   | 1.059   |
| O22          | -0.2297 | 0.0485  | 0.0745  | 222.932       | 1.059   | 1.059   |
| O11          | -0.1507 | 0.09    | -0.2337 | 223.352       | 1.047   | 1.048   |
| O11          | 0.1507  | -0.09   | 0.2337  | 223.352       | 1.047   | 1.048   |
| O12          | -0.1211 | -0.2612 | -0.07   | 229.949       | 0.873   | 0.873   |
| O12          | 0.1211  | 0.2612  | 0.07    | 229.949       | 0.873   | 0.873   |
| Next Ligand  |         |         |         |               |         |         |
| O24          | 0.1515  | -0.3096 | -0.2069 | 360.545       | 0       | 0       |

**Table S16.** ECon derived by MAPLE-calculations for cadmium atoms in Mn[B<sub>2</sub>(SO<sub>4</sub>)<sub>4</sub>] using the data from [5].

| Atom         | x      | y       | z      | Distance / pm | Econ(1) | Econ(2) |
|--------------|--------|---------|--------|---------------|---------|---------|
| Central atom |        |         |        |               |         |         |
| Cd1          | ½      | 0       | ½      |               |         |         |
| Ligand       |        |         |        |               |         |         |
| O4           | 0.2847 | -0.0442 | 0.5791 | 213.878       | 1.069   | 1.07    |
| O4           | 0.7153 | 0.0442  | 0.4209 | 213.878       | 1.069   | 1.07    |
| O7           | 0.651  | 0.0985  | 0.7226 | 213.996       | 1.066   | 1.067   |
| O7           | 0.349  | -0.0985 | 0.2774 | 213.996       | 1.066   | 1.067   |
| O6           | 0.6168 | -0.2549 | 0.5732 | 222.767       | 0.826   | 0.827   |
| O6           | 0.3832 | 0.2549  | 0.4268 | 222.767       | 0.826   | 0.827   |
| Next Ligand  |        |         |        |               |         |         |
| O1           | 0.654  | 0.3129  | 0.2956 | 360.2         | 0       | 0       |

**Table 17.** Comparison of CShM values of the coordination polyhedra surrounding B, S and M atoms in all currently know phyllosilicate analogous borosulfates with the general composition M[B<sub>2</sub>(SO<sub>4</sub>)<sub>4</sub>] with M = 2 H, Mn, Ni, Mg, Zn, Co, Cd and Ca.

| M <sup>x+</sup> | 2 H <sup>+</sup> | Mn <sup>2+</sup> | Ni <sup>2+</sup> | <sup>α</sup> Mg <sup>2+</sup> | <sup>β</sup> Mg <sup>2+</sup> | Zn <sup>2+</sup> | <sup>α</sup> Co <sup>2+</sup> | <sup>β</sup> Co <sup>2+</sup> | Cd <sup>2+</sup> | Ca <sup>2+</sup> |
|-----------------|------------------|------------------|------------------|-------------------------------|-------------------------------|------------------|-------------------------------|-------------------------------|------------------|------------------|
| S1              | 0.161            | 0.354            | 0.176            | 0.107                         | 0.108                         | 0.270            | 0.168                         | 0.268                         | 0.325            | 0.130            |
| S2              | 0.193            | 0.116            | 0.114            | 0.278                         | 0.165                         | 0.103            | 0.111                         | 0.103                         | 0.112            | 0.172            |
| S3              | 0.174            | -                | -                | -                             | -                             | -                | -                             | -                             | -                | 0.133            |
| S4              | 0.234            | -                | -                | -                             | -                             | -                | -                             | -                             | -                | 0.155            |
| B1              | 0.099            | 0.168            | 0.065            | 0.107                         | 0.060                         | 0.416            | 0.063                         | 0.419                         | 0.162            | 0.173            |
| B2              | 0.091            | -                | -                | -                             | -                             | -                | -                             | -                             | -                | 0.154            |
| M <sup>2+</sup> | -                | 0.091            | 0.176            | 0.094                         | 0.100                         | 0.205            | 0.158                         | 0.226                         | 0.141            | 1.839**          |

\*\* All coordination spheres of the metal cations except Ca<sup>2+</sup> may be described as idealized octahedra and their CShM deviation is given. For Ca<sup>2+</sup> the deviation of an ideal trigonal dodecahedron is given.

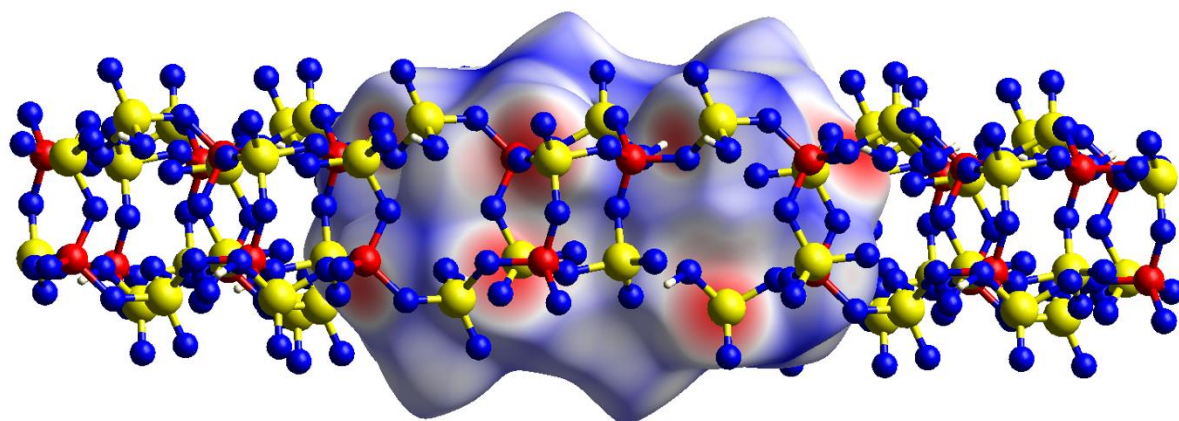

**Figure S11.** Excerpt of a single layer of  $\text{H}_2[\text{B}_2(\text{SO}_4)_2]$  viewed along the layer with the Hirshfeld-surface around one *zwölfer*-ring in the  $d_{\text{norm}}$ -mapping.

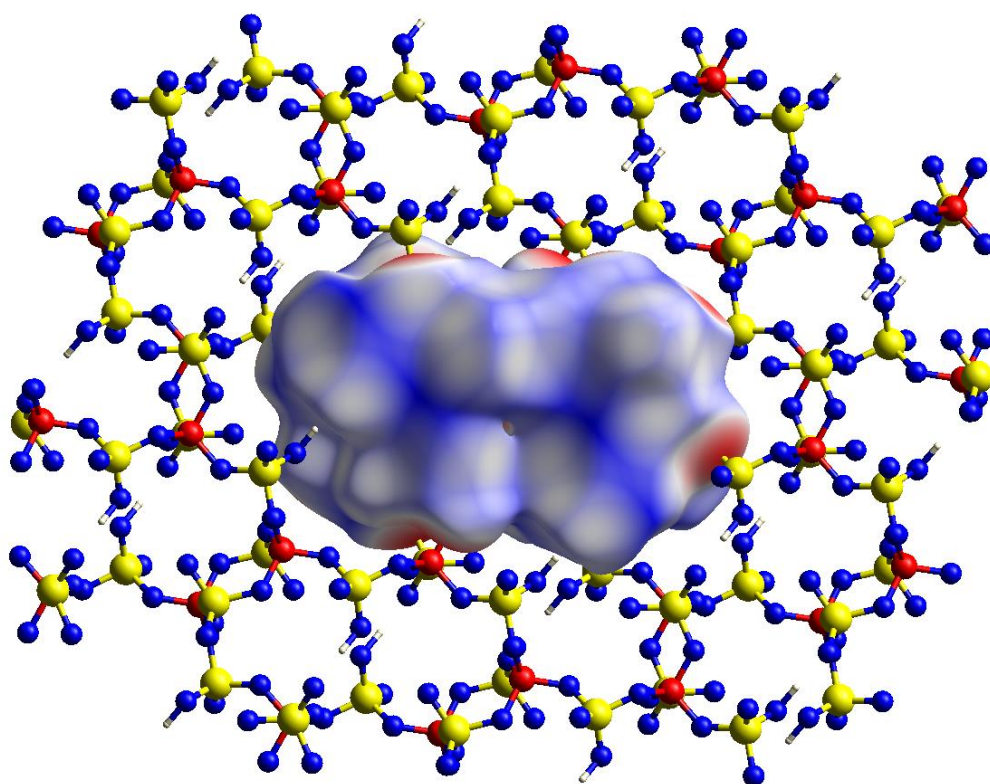

**Figure S12.** Excerpt of a single layer of  $\text{H}_2[\text{B}_2(\text{SO}_4)_2]$  viewed perpendicular to the layer with the Hirshfeld-surface around one *zwölfer*-ring in the  $d_{\text{norm}}$ -mapping.

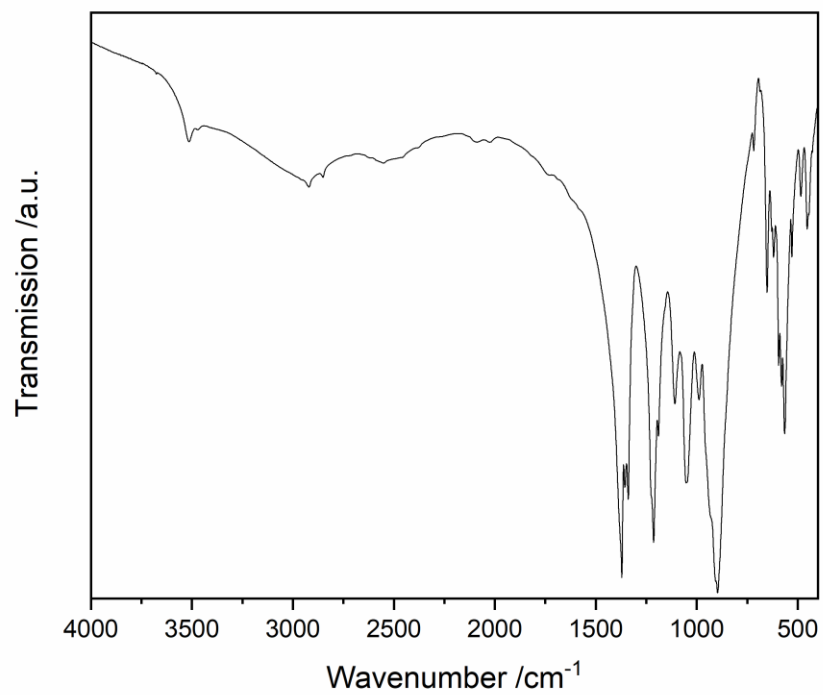

**Figure S13.** IR-spectrum of Cd[B<sub>2</sub>(SO<sub>4</sub>)<sub>2</sub>].

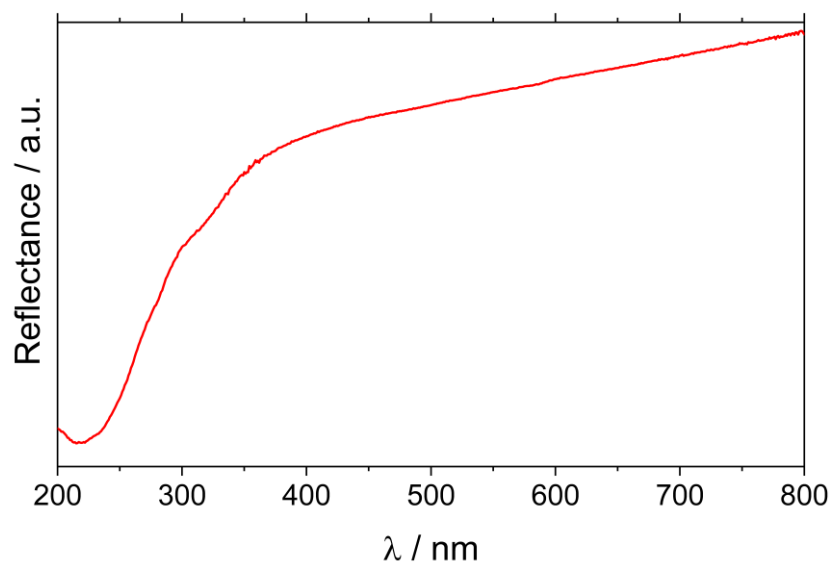

**Figure S14.** UV-Vis spectrum of Cd[B<sub>2</sub>(SO<sub>4</sub>)<sub>2</sub>].

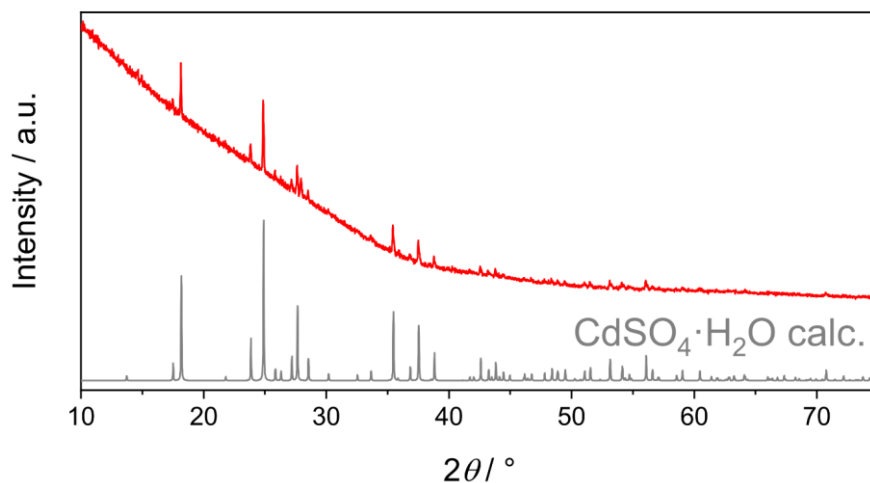

**Figure S15.** PXRD pattern of Cd[B<sub>2</sub>(SO<sub>4</sub>)<sub>2</sub>] decomposed due to the presence of moisture compared to a calculated pattern for CdSO<sub>4</sub>·H<sub>2</sub>O.<sup>[6]</sup>

## References

- [1] A. Goto, T. Hondoh, S. Mae, *J. Chem. Phys.* **1990**, *93*, 1412–1417.
- [2] G. E. Gurr, P. W. Montgomery, C. D. Knutson, B. T. Gorres, *Acta Crystallogr. B* **1970**, *26*, 906-915.
- [3] R. Pascard, C. Pascard-Billy, *Acta Crystallogr.* **1965**, *18*, 830-834.
- [4] K. Aurivillius, C. Stålhandske, *Z. Kristallogr.* **1980**, *153*, 121-129.
- [5] L. C. Pasqualini, H. Huppertz, J. Bruns, *Inorganics* **2019**, *7*, 145-154.
- [6] C. Theppitak, K. Chainok, *Acta Crystallogr. E* **2015**, *71*, i8-i9.
